# Supplementary material for: Treated domestic effluents for non-potable reuse: microbial risk assessment and economic viability
Source: Research Square preprint supplement (doi:10.21203/rs.3.rs-1544898/v1), 2022-04-13
Supplement: Supplementary file 1 [file 3e11557549bfd637fe3b4e5d.xlsx]

## Sheet: Article information
	Treated domestic effluents for non-potable reuse: microbial risk assessment and economic viability
	Luciene da Silva Santosa, Hugo Henrique de Simone Souzaa, Maria Elisa Magrib, Isaac Dennis Amoahc, Carlos Nobuyoshi Idea, Paula Loureiro Pauloa
	a Federal University of Mato Grosso do Sul (UFMS), Faculty of Engineering, Architecture and Urbanism, and Geography (FAENG), Brazil
	b Federal University of Santa Catarina (UFSC), Environmental and sanitary engineering department, Brazil
	c Institute for Water and Wastewater Technology, Durban University of Technology, Durban, South Africa
	If you have any issue using this file, please, contact Hugo Souza:
	hugo.souza@ufms.br; hugohenriquesouza@gmail.com

## Sheet: Economic evaluation
Estimated water reuse demand for street cleaning (m3/year)							Estimated water reuse volume for sewage network unblocking (m3/year)							Estimated water reuse demand for agriculture (m3/year)							Estimated population in each municipality from 2013 to 2035 (population)							Estimated increasement of wastewater treatment coverage by WWTPs (not including septic tanks) in each municipality from 2013 to 2035 (percentage %)							Estimated tariff of wastewater treatment in each municipality from 2013 to 2035 (R$/m3)							Estimated operating revenue from wastewater treatment in each municipality from 2013 to 2035 (Brazilian Reais - R$)							Estimated operating expenditure from wastewater treatment in each municipality from 2013 to 2035 (Brazilian Reais - R$)
Year	Campo Grande	Corumbá	Dourados	Ponta Porã	Três Lagoas		Year	Campo Grande	Corumbá	Dourados	Ponta Porã	Três Lagoas		Year	Campo Grande	Corumbá	Dourados	Ponta Porã	Três Lagoas		Year	Campo Grande	Corumbá	Dourados	Ponta Porã	Três Lagoas		Year	Campo Grande	Corumbá	Dourados	Ponta Porã	Três Lagoas		Year	Campo Grande	Corumbá	Dourados	Ponta Porã	Três Lagoas		Year	Campo Grande	Corumbá	Dourados	Ponta Porã	Três Lagoas		Year
2012	323255	33754.5	89411.8	29601.1	52342.7		2012	2305.8	8.7	424.7	164.4	128.3		2012	14077881	2099259	3.40108e+06	934339	1.51467e+06		2013	821186	96736	191589	66750	104547		2013	0.73	0.45	0.514	0.276	0.373		2012	2.8	2.6	1.8	2.2	1.6		2012	81386812	1.01102e+06	8247555	2.05598e+06	3.97399e+06		2012
2013	335474	35297.9	93671.6	31311	57875.7		2013	2412	292.5	429.2	164.5	129.6		2013	1.45299e+07	2137995	3.34259e+06	1002960	1501317		2014	831142	97284	194454	67771	106452		2014	0.738	0.47	0.532	0.305	0.397		2013	2.9	2.8	2	1.9	1.7		2013	9.27184e+07	3.9153e+06	1.00305e+07	1.96337e+06	4.30061e+06		2013
2014	357256	35927.4	98483.1	32427.6	59140.4		2014	2564.6	292.7	442.7	165	143		2014	14791563	1958940	3477420	1046160	1681560		2015	841098	97832	197320	68792	108358		2015	0.745	0.491	0.549	0.333	0.421		2014	3.2	2.7	2.1	2.1	1.8		2014	1.09085e+08	6.48376e+06	1.28583e+07	2.45265e+06	5.40067e+06		2014
2015	373365	36382	101495	33942.1	61014.5		2015	2661.1	292.7	985.6	308.9	204.4		2015	1.4927e+07	2.00059e+06	3.51578e+06	1.05714e+06	1.51979e+06		2016	851053	98380	200185	69812	110263		2016	0.753	0.511	0.567	0.361	0.445		2015	3.6	3	2.4	2.3	1.9		2015	1.27356e+08	8.20609e+06	1.62355e+07	3.30302e+06	6.12012e+06		2015
2016	383744	36699	105388	36507.6	64422.2		2016	3039.8	293	985.8	308.9	204.7		2016	1.44695e+07	2.17319e+06	3.74832e+06	1.12758e+06	1.73696e+06		2017	861009	98928	203051	70833	112169		2017	0.761	0.532	0.584	0.39	0.469		2016	4.1	3.7	3	2.6	2.4		2016	1.48302e+08	9.90529e+06	2.38276e+07	5.36051e+06	8.35434e+06		2016
2017	393398	38508.6	109973	37704.1	66479.9		2017	3080.2	293	1038.5	308.9	205.2		2017	14853960	2099250	4046418	1.11375e+06	1814886		2018	870965	99476	205916	71854	114074		2018	0.769	0.552	0.602	0.418	0.493		2017	4.4	3.9	3.3	2.9	2.5		2017	1.67593e+08	10620095	2.86071e+07	6.33947e+06	9.66284e+06		2017
2018	412246	38937.8	113834	39344.2	69432.5		2018	3262.4	387.7	1245.9	366.8	236.3		2018	1.49917e+07	2.09292e+06	4036827	1.17517e+06	1.83282e+06		2019	880921	100024	208782	72875	115980		2019	0.776	0.573	0.619	0.446	0.517		2018	4.7	4.1	3.4	2.9	2.7		2018	1.82679e+08	1.3464e+07	31291058	6.82509e+06	1.04346e+07		2018
2019	426864	39750	117861	40990.5	72066.8		2019	3429.6	428.4	1396.8	403.9	255.4		2019	1.51013e+07	2.09713e+06	4.16489e+06	1.2118e+06	1.89128e+06		2020	890876	100572	211647	73895	117885		2020	0.784	0.593	0.637	0.475	0.541		2019	5	4.3	3.7	3	2.9		2019	2.0028e+08	1.53994e+07	3.54787e+07	7752502	1.16153e+07		2019
2020	441482	40562.3	121889	42636.7	74701		2020	3596.8	469	1547.7	441.1	274.6		2020	1.52109e+07	2.10133e+06	4.29296e+06	1.24842e+06	1.94975e+06		2021	900832	101120	214513	74916	119791		2021	0.792	0.613	0.654	0.503	0.565		2020	5.4	4.6	4	3.2	3.1		2020	2.17882e+08	1.73347e+07	3.96663e+07	8.67991e+06	12796016		2020
2021	456100	41374.5	125916	44283	77335.3		2021	3764	509.7	1698.6	478.2	293.7		2021	1.53204e+07	2.10554e+06	4.42102e+06	1.28505e+06	2.00821e+06		2022	910788	101668	217378	75937	121696		2022	0.8	0.634	0.672	0.531	0.589		2021	5.7	4.9	4.3	3.4	3.3		2021	2.35483e+08	1.92701e+07	4.38539e+07	9607317	1.39767e+07		2021
2022	470718	42186.7	129944	45929.3	79969.6		2022	3931.2	550.3	1849.5	515.3	312.9		2022	1.543e+07	2.10975e+06	4.54908e+06	1.32167e+06	2.06668e+06		2023	920744	102216	220244	76958	123602		2023	0.807	0.654	0.69	0.56	0.612		2022	6.1	5.1	4.6	3.5	3.5		2022	2.53085e+08	21205472	4.80415e+07	1.05347e+07	1.51574e+07		2022
2023	485337	42999	133972	47575.5	82603.8		2023	4098.4	591	2000.5	552.5	332.1		2023	1.55395e+07	2.11395e+06	4.67715e+06	1.3583e+06	2.12514e+06		2024	930700	102764	223109	77979	125507		2024	0.815	0.675	0.707	0.588	0.636		2023	6.4	5.4	4.9	3.7	3.7		2023	2.70686e+08	2.31408e+07	5.22291e+07	11462132	1.63382e+07		2023
2024	499955	43811.2	137999	49221.8	85238.1		2024	4265.6	631.6	2151.4	589.6	351.2		2024	1.56491e+07	2.11816e+06	4.80521e+06	1.39492e+06	2.1836e+06		2025	940655	103311	225974	78999	127412		2025	0.823	0.695	0.725	0.616	0.66		2024	6.8	5.7	5.2	3.8	3.9		2024	2.88288e+08	2.50762e+07	5.64167e+07	1.23895e+07	1.75189e+07		2024
2025	514573	44623.5	142027	50868.1	87872.4		2025	4432.8	672.3	2302.3	626.8	370.4		2025	1.57586e+07	2.12236e+06	4.93328e+06	1.43155e+06	2.24207e+06		2026	950611	103859	228840	80020	129318		2026	0.83	0.716	0.742	0.645	0.684		2025	7.1	5.9	5.5	4	4.1		2025	3.05889e+08	2.70116e+07	60604304	13316947	1.86996e+07		2025
2026	529191	45435.7	146054	52514.4	90506.6		2026	4600	712.9	2453.2	663.9	389.5		2026	1.58682e+07	2126567	5.06134e+06	1.46817e+06	2.30053e+06		2027	960567	104407	231705	81041	131223		2027	0.838	0.736	0.76	0.673	0.708		2026	7.4	6.2	5.8	4.2	4.3		2026	3.2349e+08	2.89469e+07	6.47919e+07	1.42444e+07	1.98803e+07		2026
2027	543809	46248	150082	54160.6	93140.9		2027	4767.2	753.6	2604.1	701.1	408.7		2027	15977756	2.13077e+06	5.1894e+06	1.5048e+06	2358994		2028	970523	104955	234571	82062	133129		2028	0.846	0.757	0.777	0.702	0.732		2027	7.8	6.5	6.1	4.3	4.5		2027	3.41092e+08	3.08823e+07	6.89795e+07	15171762	2.1061e+07		2027
2028	558428	47060.2	154110	55806.9	95775.2		2028	4934.4	794.3	2755	738.2	427.9		2028	1.60873e+07	2.13498e+06	5.31747e+06	1.54142e+06	2.41746e+06		2029	980478	105503	237436	83082	135034		2029	0.854	0.777	0.795	0.73	0.756		2028	8.1	6.7	6.4	4.5	4.7		2028	3.58693e+08	3.28176e+07	7.31671e+07	1.60992e+07	2.22417e+07		2028
2029	573046	47872.4	158137	57453.2	98409.4		2029	5101.6	834.9	2905.9	775.4	447		2029	1.61969e+07	2.13918e+06	5.44553e+06	1.57805e+06	2.47592e+06		2030	990434	106051	240302	84103	136940		2030	0.861	0.798	0.812	0.758	0.78		2029	8.5	7	6.7	4.6	4.9		2029	3.76295e+08	3.4753e+07	7.73547e+07	17026577	2.34224e+07		2029
2030	587664	48684.7	162165	59099.4	101044		2030	5268.8	875.6	3056.8	812.5	466.2		2030	1.63064e+07	2.14339e+06	5573596	1.61467e+06	2.53439e+06		2031	1000390	106599	243167	85124	138845		2031	0.869	0.818	0.83	0.787	0.804		2030	8.8	7.3	7	4.8	5.1		2030	3.93896e+08	3.66884e+07	8.15423e+07	1.7954e+07	2.46031e+07		2030
2031	602282	49496.9	166192	60745.7	103678		2031	5436	916.2	3207.7	849.7	485.3		2031	1.6416e+07	2.14759e+06	5.70166e+06	1.6513e+06	2.59285e+06		2032	1010346	107147	246033	86145	140751		2032	0.877	0.839	0.847	0.815	0.828		2031	9.2	7.5	7.3	5	5.3		2031	4.11498e+08	3.86237e+07	8.57299e+07	18881392	2.57839e+07		2031
2032	616900	50309.2	170220	62392	106312		2032	5603.2	956.9	3358.6	886.8	504.5		2032	1.65255e+07	2.1518e+06	5.82972e+06	1.68792e+06	2651313		2033	1020301	107695	248898	87165	142656		2033	0.885	0.859	0.865	0.843	0.852		2032	9.5	7.8	7.6	5.1	5.5		2032	4.29099e+08	4.05591e+07	89917550	1.98088e+07	2.69646e+07		2032
2033	631519	51121.4	174248	64038.2	108946		2033	5770.4	997.5	3509.5	923.9	523.7		2033	16635097	2.15601e+06	5.95779e+06	1.72455e+06	2.70978e+06		2034	1030257	108243	251764	88186	144562		2034	0.892	0.88	0.882	0.872	0.876		2033	9.8	8.1	7.9	5.3	5.7		2033	4.46701e+08	4.24945e+07	9.41052e+07	20736207	28145283		2033
2034	646137	51933.7	178275	65684.5	111581		2034	5937.6	1038.2	3660.4	961.1	542.8		2034	1.67447e+07	2.16021e+06	6.08585e+06	1.76117e+06	2.76824e+06		2035	1040213	108791	254629	89207	146467		2035	0.9	0.9	0.9	0.9	0.9		2034	10.2	8.3	8.2	5.4	5.9		2034	4.64302e+08	4.44298e+07	9.82928e+07	2.16636e+07	2.9326e+07		2034
2035	660755	52745.9	182303	67330.8	114215		2035	6104.8	1078.8	3811.4	998.2	562		2035	1.68542e+07	2.16442e+06	6.21392e+06	1.7978e+06	2.8267e+06		Source: Linear projection based on ANA (2017).							Source: Linear projection based on ANA (2017).							2035	10.5	8.6	8.5	5.6	6.1		2035	4.81904e+08	4.63652e+07	1.0248e+08	22591022	3.05067e+07		2035
Source: Linear projection based on estimates from 2012 to 2017, considering SNIS data related to water access to the population. It should be noted that this table was considered on the average panorama of investment, thus, for minimum and maximum conditions we considered a variation of ±20% on this data.							Source: Linear projection based on estimates from 2012 to 2017, considering SNIS data related to extension of sewage network. It should be noted that this table was considered on the average panorama of investment, thus, for minimum and maximum conditions we considered a variation of ±20% on this data.							Source: Linear projection based on estimates from 2012 to 2017, considering total volume of water produced by each municipality (SNIS 2018), as well as the percentage of water use allotted to agriculture in Brazil (FAO, 2019). It should be noted that this table was considered on the average panorama of investment, thus, for minimum and maximum conditions we considered a variation of ±20% on this …																					Source: Linear projection based on SNIS data from 2012 to 2017.							Source: Linear projection based on SNIS data from 2012 to 2017.							Source: Linear projection based on SNIS data from 2012 to 2017, assuming that estimated operating expenditure of the wastewater treatment service was the total expenses with both water and sewage services multiplied by the share of operational revenue from sewage in total operating revenue.
[truncated: 5 more columns]

## Sheet: E. coli_data
E. coli (UFC/ 100mL) data
			N	P 10%	P 90%	Average	DP	Minimum	Maximum
Três Lagoas	WWTP 1	Planalto	25	504000	8.32e+06	1.21614e+06	7.09185e+06	4000	32000000
Três Lagoas	WWTP 2	Jupiá	0
Corumbá	WWTP 1	Olaria	16	6000	185000	43582.1	72716.5	3800	220000
Corumbá	WWTP 2	Maria Leite	0
Dourados	WWTP 1	Guaxinim	18	520000	4.49e+06	1.27491e+06	1.63827e+06	350000	5600000
Dourados	WWTP 2	Água Boa	0
Dourados	WWTP 3	Laranja Doce	18	177500	2.64e+06	748926	1.24826e+06	81000	5100000
Dourados	WWTP 4	Harry Amorim	0
Ponta Porã	WWTP 1	Estoril	34	366000	7.79e+06	1.35139e+06	2.55229e+07	1000	151000000
Ponta Porã	WWTP 2	São Thomaz	0

## Sheet: Final effluent
Treatment station	Population project (inhab.)	Project flow (l/s)	Treatment process	E coli efluente without desinfection (MPN/ 100ml)	E coli efluente with desinfection (MPN/ 100ml)
Três Lagoas WWTP 1 Planalto	72000	100	UASB + Chemical physician	1,2 x 106	1,2 x 103
Três Lagoas WWTP 2 Jupiá	28800	80	UASB + Biodrum + Secondary decanter
Corumbá WWTP 1 Olaria	57600	80	UASB + Trickling filter + Secondary decanter	4,4 x 104	4,4 x 101
Corumbá WWTP 2 Maria Leite	57600	80	UASB + Trickling filter + Secondary decanter
Dourados WWTP 1 Guaxinin	86400	120	UASB + Trickling filter + Secondary decanter	1,3 x 106	1,3 x 103
Dourados WWTP 2 Água Boa	79200	110	UASB + Trickling filter + Secondary decanter
Dourados WWTP 3 Laranja Doce	28800	40	UASB + Trickling filter + Secondary decanter	7,5 x 105	7,5 x 103
Dourados WWTP 4 Harry Amorim	28800	40	UASB + Facultative pond
Ponta Porã WWTP 1 Estoril	57600	80	UASB + Trickling filter + Secondary decanter	1,4 x 106	1,4 x 103
Ponta Porã WWTP 2 São Thomaz	28800	40	UASB + Trickling filter + Secondary decanter
Campo Grande WWTP 1 Imbirussú	67000	120	Compact aerobic system + Unitank	2,8 x 104	2,8 x 101
Campo Grande WWTP 2 Los Angeles	500000	900	UASB+ Chemical physician	8,0 x 106	8,0 x 103
